# Supplementary material for: Exploring Alcohol-Related Behaviours in an Adult Sample with Anorexia Nervosa and Those in Recovery
Source: MDPI journal article supplement (doi:10.3390/nu16050732), 2024-03-04
Supplement: s1 [file s1]

**Table S1.** Descriptive statistics of AUDIT scores with the statistical significance of the group comparison from the ANCOVA models for Caucasian participants divided into three groups: AN, recovered AN, and healthy controls.

| Variables                | Anorexia Nervosa<br>( <i>n</i> = 52) | Recovered AN<br>( <i>n</i> = 23) | Healthy Controls<br>( <i>n</i> = 30) | Group Comparisons               |               |               |               |
|--------------------------|--------------------------------------|----------------------------------|--------------------------------------|---------------------------------|---------------|---------------|---------------|
|                          | <i>M, SD</i>                         | <i>M, SD</i>                     | <i>M, SD</i>                         | Total Model                     | AN vs. HC     | AN vs Rec-AN  | HC vs Rec-AN  |
| Alcohol Consumption      | 2.88 (2.87)                          | 4.57 (2.71)                      | 4.47 (1.63)                          | $F(2) = 7.093$<br>$p < 0.001$   | $p = 0.002^*$ | $p = 0.005^*$ | $p = 0.928$   |
| Alcohol Dependence       | 0.48 (1.87)                          | 0.65 (1.11)                      | 0.33 (0.60)                          | $F(2) = 2.326$<br>$p = 0.103$   | $p = 0.314$   | $p = 0.278$   | $p = 0.035$   |
| Alcohol-Related Problems | 1.34 (2.97)                          | 1.66 (1.92)                      | 0.57 (0.82)                          | $F(2) = 5.058$<br>$p = 0.042^*$ | $p = 0.452$   | $p = 0.015^*$ | $p = 0.043^*$ |
| AUDIT Total              | 4.71 (6.48)                          | 6.87 (4.79)                      | 5.34 (2.48)                          | $F(2) = 3.255$<br>$p = 0.040^*$ | $p = 0.026^*$ | $p = 0.004^*$ | $p = 0.410$   |

Note: This table illustrates the descriptive statistics and group comparisons for the scores of the Alcohol Use Identification Test (AUDIT) across three groups in the Caucasian sample. *M* and *SD* represent mean and standard deviation, respectively. \* indicates significance at the 0.05 level.
